# Supplementary material for: Thiol-promoted catalytic synthesis of high-performance furan-containing lubricant base oils from biomass derived 2-alkylfurans and ketones
Source: Royal Society of Chemistry journal article supplement (doi:10.1039/d0gc01897j), 2020-01-01
Supplement: d0gc01897j1.pdf [file d0gc01897j1.pdf]

## Supporting Information

### **Thiol-promoted catalytic synthesis of high-performance furan-containing lubricant base oils from biomass derived 2-alkylfurans and ketones**

Sibao Liu<sup>1,2</sup>, Rameswar Bhattacharjee<sup>1</sup>, Sha Li<sup>1</sup>, Andrew Danielson<sup>1,3</sup>, Tobias Mazal<sup>1,3</sup>, Basudeb Saha<sup>1\*</sup>, and Dionisios G. Vlachos<sup>1,3\*</sup>

<sup>1</sup>Catalysis Center for Energy Innovation, University of Delaware, 221 Academy St., Newark, DE 19716, USA

<sup>2</sup>Current address: Key Laboratory for Green Chemical Technology of Ministry of Education, School of Chemical Engineering and Technology, Tianjin University, Tianjin 300072, China

<sup>3</sup>Department of Chemical and Biomolecular Engineering, University of Delaware, 150 Academy St., Newark, DE 19716, USA

\*Corresponding authors: vlachos@udel.edu, bsaha@udel.edu

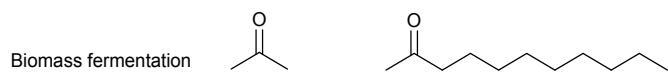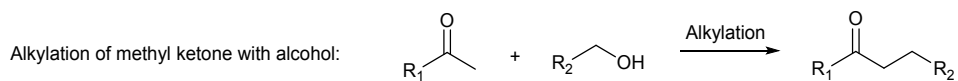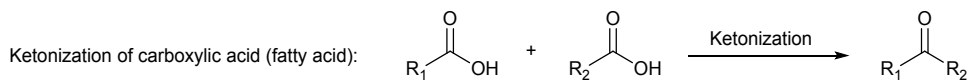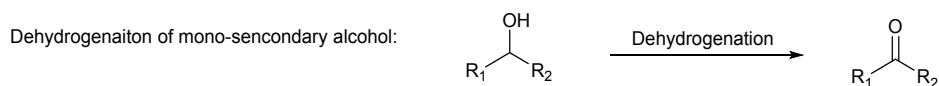

From fuanic compounds:

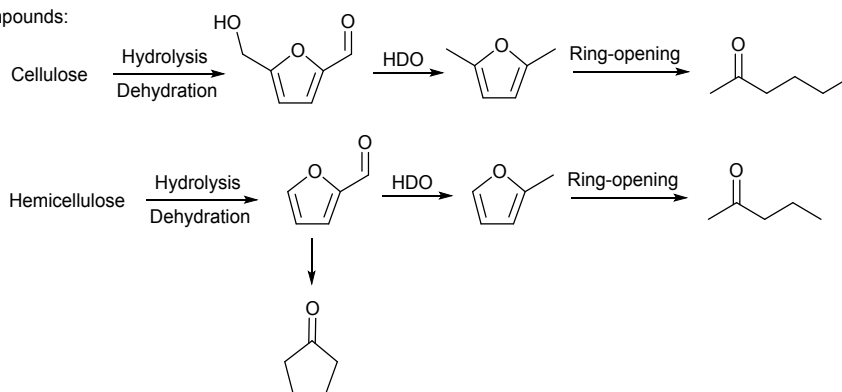

From lignin:

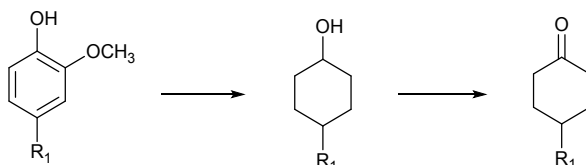

**Scheme S1.** Strategies for the synthesis of various ketones.

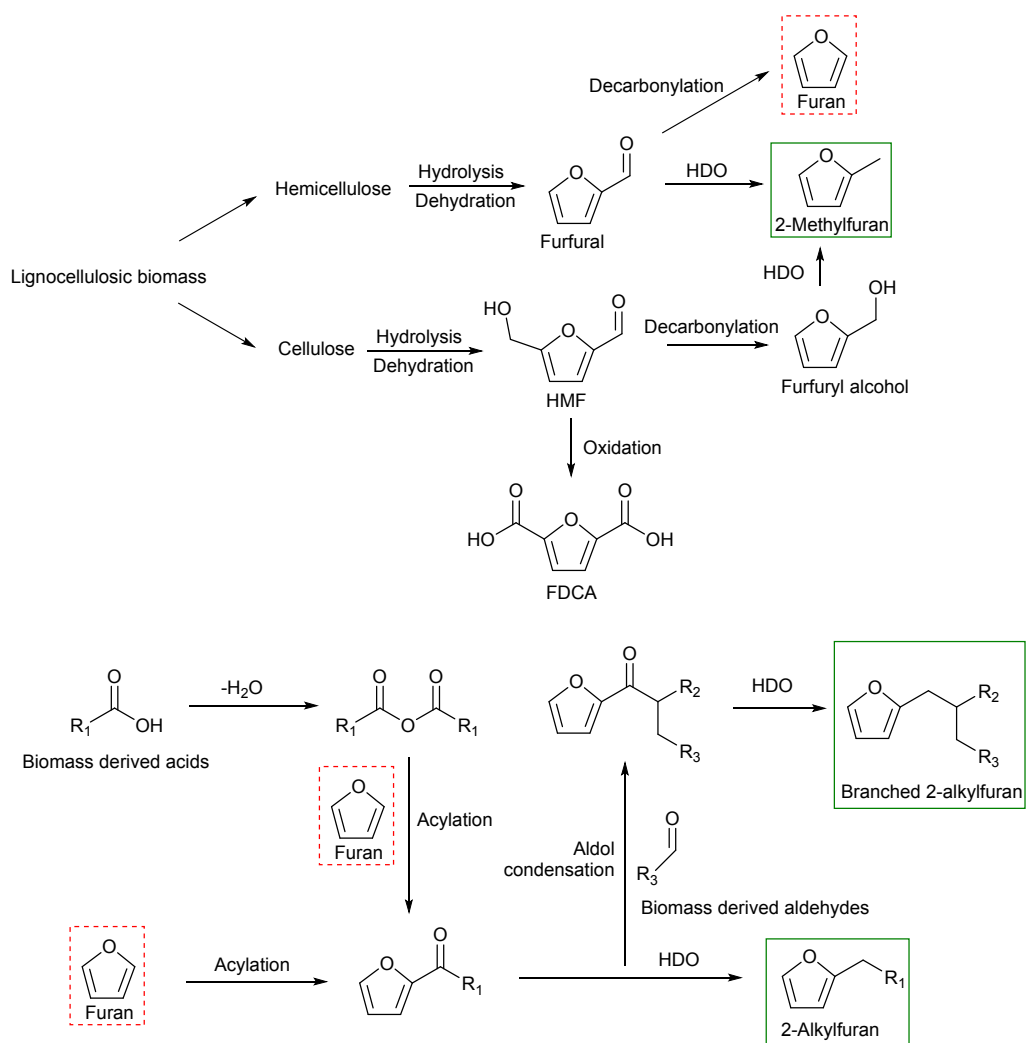

**Scheme S2.** Strategies for the synthesis of various furanic compounds.

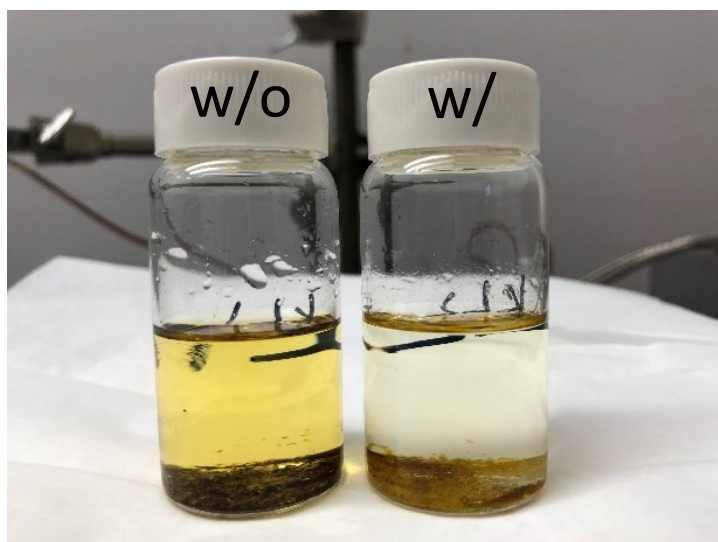

**Figure S1.** Solutions diluted by 10 ml cyclohexane and catalysts after the reaction without (left) and with (right) 1-propanethiol. Reaction conditions: 4 mmol 2-PF, 2 mmol 2-undecanone, 0.05 g Aquivion PW79S (0.063 mmol H<sup>+</sup>), SH/H<sup>+</sup>=1 (molar ratio), 65 °C, 4 h reaction time.

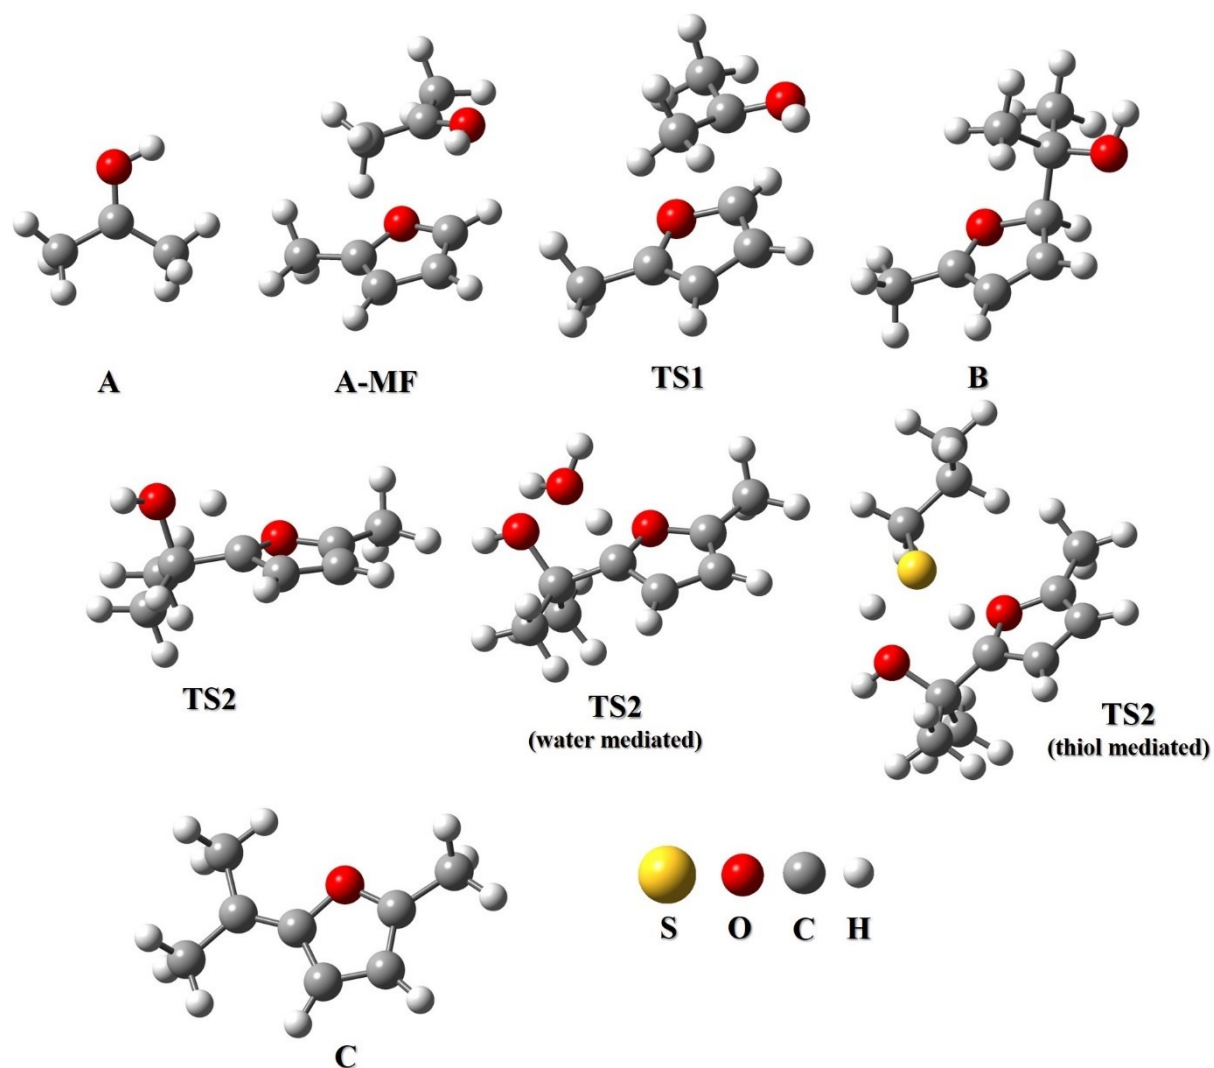

Figure S2: Optimized structures of intermediates and transition states shown in Figure 2a of the manuscript.

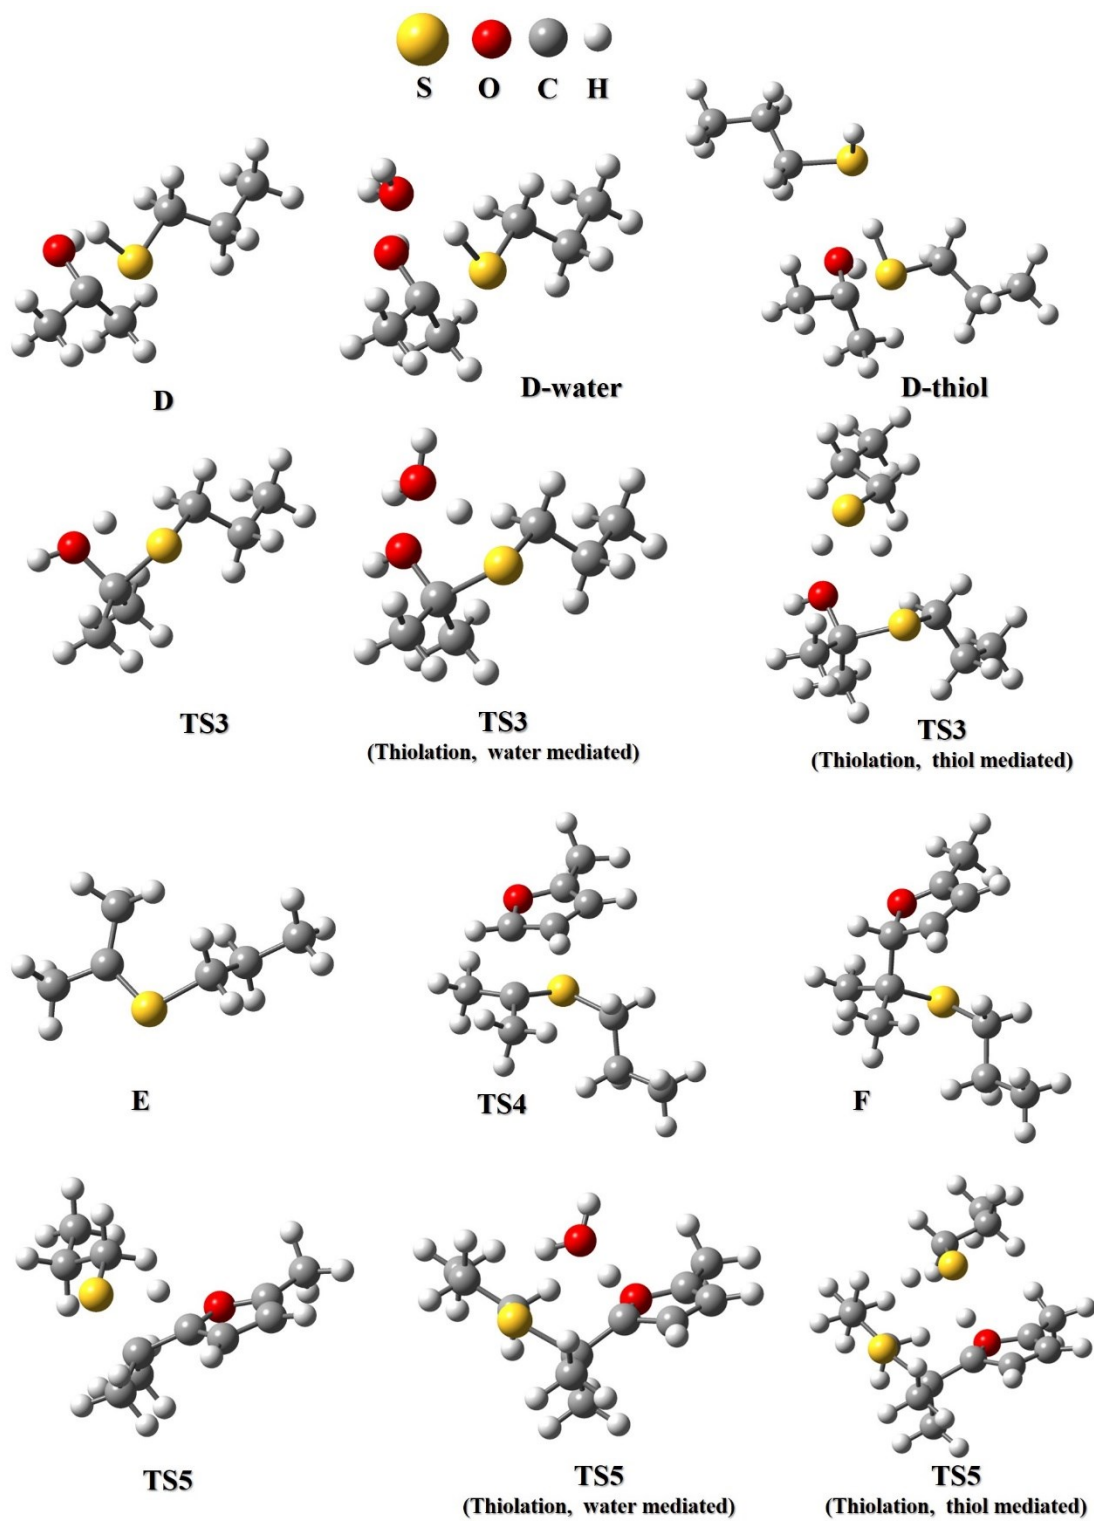

FigureS3: Optimized structures of intermediates and transition states shown in Figure 2b

of the manuscript.

## Cartesian Coordinates:

### A (Electronic energy: -193.4480054 Ha):

|   |             |             |             |
|---|-------------|-------------|-------------|
| C | 0.00530000  | 0.06452500  | -0.00049300 |
| C | 1.34682500  | -0.52480500 | -0.00784800 |
| H | 1.36301800  | -1.43145700 | -0.61310400 |
| H | 2.10050000  | 0.19375800  | -0.31856600 |
| H | 1.55271300  | -0.83455200 | 1.02651000  |
| C | -1.21274500 | -0.75724400 | 0.00677200  |
| H | -2.10342500 | -0.20369600 | 0.29938400  |
| H | -1.34282800 | -1.13219400 | -1.01745900 |
| H | -1.07047300 | -1.63383600 | 0.64002400  |
| O | -0.04827200 | 1.33078500  | -0.00482000 |
| H | -0.94960200 | 1.70084000  | 0.03119200  |

### A-MF (Electronic energy: -462.7861733 Ha):

|   |             |             |             |
|---|-------------|-------------|-------------|
| C | 1.85704200  | -0.18224400 | 0.01159000  |
| C | 2.68161600  | -1.40182300 | 0.17950500  |
| O | 0.96784100  | -0.17513400 | -1.01523400 |
| C | 1.79308200  | 1.00441600  | 0.67364100  |
| C | 0.34885600  | 1.03508100  | -1.01642600 |
| C | 0.81403600  | 1.79851800  | -0.00034200 |
| H | 2.05896900  | -2.28787100 | 0.31602000  |
| H | 3.30213400  | -1.56518600 | -0.70250800 |
| H | 3.32989700  | -1.29229400 | 1.04564400  |
| H | 2.39580200  | 1.28616500  | 1.52091500  |
| H | 0.53053500  | 2.81479200  | 0.21796200  |
| H | -0.32756600 | 1.22363800  | -1.83338000 |
| C | -1.95123400 | -0.30875700 | 0.24379600  |
| C | -1.13663200 | -0.82097300 | 1.34788400  |
| H | -0.11508100 | -0.42140800 | 1.21990000  |
| H | -1.50617500 | -0.49060600 | 2.31887100  |
| H | -1.06977700 | -1.90665700 | 1.30511000  |
| C | -2.11620200 | -1.04164700 | -1.01792300 |

|   |             |             |             |
|---|-------------|-------------|-------------|
| H | -2.54804300 | -0.41537300 | -1.79363500 |
| H | -1.16568200 | -1.47892900 | -1.32280700 |
| H | -2.80324600 | -1.87138300 | -0.80339300 |
| O | -2.63067500 | 0.76341800  | 0.36019400  |
| H | -2.52247700 | 1.20342000  | 1.22125700  |

**TS1(Electronic energy: -462.7829104 Ha):**

|   |             |             |             |
|---|-------------|-------------|-------------|
| C | 1.88314900  | -0.06124400 | -0.02877600 |
| C | 2.96877400  | -0.98840400 | 0.35406700  |
| O | 0.93713500  | -0.52633900 | -0.85485800 |
| C | 1.61972900  | 1.24829000  | 0.30129100  |
| C | 0.01789000  | 0.46641900  | -1.04833200 |
| C | 0.44308400  | 1.59467500  | -0.37707900 |
| H | 2.56536400  | -1.88333500 | 0.83047900  |
| H | 3.51561900  | -1.30588800 | -0.53533500 |
| H | 3.65641300  | -0.49810000 | 1.03801200  |
| H | 2.21844100  | 1.86701900  | 0.94829700  |
| H | -0.05548600 | 2.55200100  | -0.38142000 |
| H | -0.61349800 | 0.36297100  | -1.91484900 |
| C | -1.70878400 | -0.19829600 | 0.23002400  |
| C | -1.04364200 | -0.29346700 | 1.55243700  |
| H | -0.06275100 | -0.76035100 | 1.46872400  |
| H | -0.94461900 | 0.67397300  | 2.04163300  |
| H | -1.66093200 | -0.95118300 | 2.17413400  |
| C | -1.97046500 | -1.43931400 | -0.54913800 |
| H | -2.36461700 | -1.20980300 | -1.53613800 |
| H | -1.08368500 | -2.06347500 | -0.61616500 |
| H | -2.74278200 | -1.98779700 | 0.00209800  |
| O | -2.58174600 | 0.74729500  | 0.00708500  |
| H | -2.52898300 | 1.46436600  | 0.65575800  |

**B (Electronic energy: -462.8045912 Ha):**

|   |             |             |             |
|---|-------------|-------------|-------------|
| C | 1.88857300  | -0.10990500 | -0.06945900 |
| C | 3.09406100  | -0.90693900 | 0.18871400  |
| O | 0.84202600  | -0.68704500 | -0.54278600 |
| C | 1.68406500  | 1.28999900  | 0.12999700  |
| C | -0.21014400 | 0.28608900  | -0.70425100 |
| C | 0.41734100  | 1.54085600  | -0.25242700 |
| H | 2.93122200  | -1.95631000 | -0.03832600 |



|   |             |             |             |
|---|-------------|-------------|-------------|
| H | 3.91283400  | -0.51057800 | -0.41824200 |
| H | 3.38763100  | -0.78012900 | 1.23371100  |
| H | 2.42535800  | 1.97052100  | 0.51712700  |
| H | -0.11638800 | 2.48043400  | -0.23905200 |
| H | -0.46067700 | 0.31548700  | -1.76944700 |
| C | -1.48156100 | -0.13766800 | 0.08158100  |
| C | -1.17966900 | -0.34901300 | 1.55883800  |
| H | -0.48318600 | -1.17387900 | 1.71573100  |
| H | -0.78473000 | 0.55868700  | 2.01483600  |
| H | -2.10694700 | -0.60335600 | 2.07315000  |
| C | -2.08379800 | -1.37757500 | -0.55933900 |
| H | -2.34501600 | -1.18315300 | -1.59961600 |
| H | -1.39604500 | -2.22229300 | -0.51363500 |
| H | -2.99065200 | -1.65864500 | -0.02112800 |
| O | -2.28547500 | 1.00521200  | -0.12030900 |
| H | -3.19902000 | 0.80282300  | 0.10772300  |

**TS2 (Electronic energy: -462.7488015 Ha):**

|   |             |             |             |
|---|-------------|-------------|-------------|
| C | -2.04137800 | -0.05409800 | -0.03458800 |
| C | -3.26017600 | -0.88577300 | -0.02397800 |
| O | -0.87683600 | -0.66920900 | 0.08061200  |
| C | -1.86505800 | 1.31839200  | -0.11228600 |
| C | 0.12066400  | 0.29079400  | 0.13393300  |
| C | -0.49792900 | 1.53743600  | -0.04774800 |
| H | -4.13304600 | -0.27936400 | -0.24953300 |
| H | -3.17090800 | -1.69022900 | -0.75440100 |
| H | -3.38677300 | -1.34136900 | 0.96037900  |
| H | -2.64984600 | 2.05055700  | -0.19849100 |
| H | 0.00977900  | 2.48929400  | -0.08657000 |
| H | 0.71125600  | 0.28619300  | 1.38143400  |
| C | 1.55492600  | -0.17636800 | -0.07510700 |
| C | 2.43385700  | 0.87935100  | -0.70645600 |
| H | 2.15625800  | 1.01344900  | -1.75126800 |
| H | 2.34667800  | 1.83957600  | -0.19593200 |
| H | 3.47558300  | 0.55665300  | -0.67165400 |
| C | 1.68445000  | -1.54670300 | -0.69100600 |
| H | 1.08705200  | -2.27523100 | -0.14768200 |
| H | 1.35368400  | -1.51776800 | -1.72918800 |
| H | 2.72949200  | -1.85431700 | -0.66457300 |

|   |            |             |            |
|---|------------|-------------|------------|
| O | 1.87625700 | -0.28301300 | 1.39459500 |
| H | 2.69928000 | 0.16214600  | 1.64923500 |

**TS2 (No thiolation, water mediated) (Electronic energy: -539.2228466 Ha):**

|   |             |             |             |
|---|-------------|-------------|-------------|
| C | 2.12920800  | -0.13579100 | -0.02224800 |
| C | 3.35281500  | -0.33849100 | -0.82554400 |
| O | 0.96389900  | -0.22894800 | -0.64340300 |
| C | 1.94984800  | 0.18037200  | 1.31051000  |
| C | -0.04854200 | 0.06962300  | 0.26460200  |
| C | 0.57424100  | 0.26925100  | 1.50299200  |
| H | 4.23318000  | -0.29280700 | -0.19036300 |
| H | 3.31370200  | -1.30733900 | -1.32456900 |
| H | 3.42732000  | 0.42947700  | -1.59724000 |
| H | 2.73151900  | 0.33338200  | 2.03495100  |
| H | 0.05780500  | 0.50619900  | 2.42141500  |
| H | -0.33648900 | 1.40627000  | 0.02623900  |
| C | -1.40966600 | -0.53464300 | -0.04686700 |
| C | -2.36860800 | -0.25639100 | 1.10290300  |
| H | -2.08084200 | -0.80361900 | 2.00033100  |
| H | -2.41574300 | 0.80975400  | 1.33237100  |
| H | -3.36845800 | -0.58407200 | 0.81749800  |
| C | -1.27964600 | -2.02387200 | -0.33684300 |
| H | -0.64245000 | -2.18748400 | -1.20408700 |
| H | -0.85779100 | -2.54656200 | 0.52173600  |
| H | -2.26643900 | -2.44685800 | -0.53601100 |
| O | -1.85914400 | 0.14808600  | -1.23130000 |
| H | -2.60547400 | -0.32966700 | -1.60860900 |
| O | -0.93562100 | 2.41229700  | -0.42890700 |
| H | -0.40007800 | 3.04734000  | -0.92286300 |
| H | -1.54072400 | 1.93415600  | -1.03894800 |

**TS2 (No thiolation, thiol mediated) (Electronic energy: -539.2228466 Ha):**

|   |             |            |             |
|---|-------------|------------|-------------|
| C | 0.41165100  | 2.05536900 | -0.22820000 |
| C | 1.51103100  | 2.84406900 | 0.36859600  |
| O | -0.08767000 | 1.05105500 | 0.48748200  |
| C | -0.24033400 | 2.15877500 | -1.43783300 |
| C | -1.07180700 | 0.42242800 | -0.26425400 |
| C | -1.21454800 | 1.15942100 | -1.44142300 |
| H | 2.34176100  | 2.19710000 | 0.65340900  |
| H | 1.86225800  | 3.59211100 | -0.33728300 |
| H | 1.15693900  | 3.34486800 | 1.27141600  |

|   |             |             |             |
|---|-------------|-------------|-------------|
| H | -0.02668300 | 2.87716000  | -2.21093400 |
| H | -1.91420600 | 0.93226200  | -2.23148300 |
| H | -0.31778800 | -0.62360200 | -0.86371200 |
| C | -2.10503000 | -0.35690100 | 0.52670200  |
| C | -3.13465000 | -0.94844100 | -0.42850100 |
| H | -3.73951300 | -0.17218100 | -0.89718200 |
| H | -2.65710300 | -1.54556800 | -1.20796000 |
| H | -3.80261000 | -1.60202700 | 0.13263200  |
| C | -2.75745300 | 0.54823500  | 1.56628700  |
| H | -2.01033100 | 0.91995400  | 2.26589200  |
| H | -3.25288400 | 1.39415900  | 1.08965200  |
| H | -3.51174300 | -0.01471700 | 2.12031500  |
| H | -0.22984000 | -2.71775700 | -0.51640300 |
| C | 1.75062000  | -1.61856100 | 0.28633400  |
| H | 2.16063100  | -2.58075700 | 0.59049600  |
| H | 1.12219000  | -1.22246900 | 1.08321500  |
| C | 2.85226300  | -0.65214500 | -0.12153800 |
| H | 2.40645600  | 0.23925900  | -0.57322800 |
| H | 3.47738400  | -1.10947500 | -0.89086200 |
| C | 3.69952400  | -0.26674800 | 1.08604800  |
| H | 4.18528900  | -1.14250000 | 1.51744400  |
| H | 4.48017700  | 0.43819600  | 0.80208000  |
| H | 3.08782700  | 0.19176400  | 1.86548800  |
| S | 0.66064900  | -1.93412600 | -1.14377800 |
| O | -1.37429300 | -1.39892600 | 1.17040300  |
| H | -1.90050400 | -1.73979500 | 1.90108000  |

**C (Electronic energy: -386.3786327 Ha):**

|   |             |             |             |
|---|-------------|-------------|-------------|
| C | 1.78897500  | -0.05995800 | 0.00000000  |
| C | 3.02561200  | -0.85675500 | 0.00006600  |
| O | 0.64262200  | -0.69905000 | 0.00005400  |
| C | 1.58712000  | 1.32757800  | -0.00008300 |
| C | -0.37843500 | 0.23817200  | 0.00000300  |
| C | 0.22879400  | 1.51640700  | -0.00008800 |
| H | 3.89850000  | -0.21059500 | -0.00026100 |
| H | 3.04521100  | -1.50252500 | 0.88069300  |
| H | 3.04494900  | -1.50312500 | -0.88011800 |
| H | 2.36672100  | 2.07076700  | -0.00013600 |
| H | -0.29687800 | 2.45794100  | -0.00015100 |

|   |             |             |             |
|---|-------------|-------------|-------------|
| C | -1.67306300 | -0.17391000 | 0.00002400  |
| C | -2.78753300 | 0.80643700  | 0.00011200  |
| H | -3.41721300 | 0.62693100  | 0.87559400  |
| H | -2.46546200 | 1.84295200  | -0.00083800 |
| H | -3.41860500 | 0.62569000  | -0.87409200 |
| C | -2.02928700 | -1.61401700 | -0.00008700 |
| H | -1.16673400 | -2.27168100 | 0.00119300  |
| H | -2.65359300 | -1.82370000 | 0.87305000  |
| H | -2.65097900 | -1.82397900 | -0.87505700 |

**D (Electronic energy: -710.773199 Ha):**

|   |             |             |             |
|---|-------------|-------------|-------------|
| C | -1.50947800 | 0.31822300  | 0.06822800  |
| C | -2.82624800 | -0.31562600 | -0.31920800 |
| H | -2.82303100 | -0.65167800 | -1.35504000 |
| H | -3.06901200 | -1.14538900 | 0.34372500  |
| H | -3.59928400 | 0.44465800  | -0.19819100 |
| C | -1.08990700 | 1.49311000  | -0.78439900 |
| H | -0.13068700 | 1.90111700  | -0.45985800 |
| H | -1.02742600 | 1.22581100  | -1.83832900 |
| H | -1.84875400 | 2.26988600  | -0.67130200 |
| C | 1.32781600  | -0.54568100 | 0.49337100  |
| C | 2.29155000  | 0.03546400  | -0.53420400 |
| C | 3.55556200  | 0.53364100  | 0.15936000  |
| S | -0.20698700 | -1.11803800 | -0.30016700 |
| H | 1.04257200  | 0.16545600  | 1.27055800  |
| H | 1.75173300  | -1.42499100 | 0.97916800  |
| H | 1.81777000  | 0.85302400  | -1.08192700 |
| H | 2.54067600  | -0.73422700 | -1.26677300 |
| H | 4.05747300  | -0.27759000 | 0.68754200  |
| H | 4.25220900  | 0.93862600  | -0.57207300 |
| H | 3.32878400  | 1.32040100  | 0.87990200  |
| O | -1.48062000 | 0.55606100  | 1.40972900  |
| H | -0.96261400 | 1.34173500  | 1.62006500  |
| H | -0.66943100 | -1.90149600 | 0.68849000  |

**D-H<sub>2</sub>O (Electronic energy: -787.2162875 Ha):**

|   |             |             |             |
|---|-------------|-------------|-------------|
| C | 1.12686200  | -0.85748600 | 0.14561500  |
| C | 2.46214700  | -0.92237200 | -0.56599000 |
| H | 2.35489400  | -1.31366400 | -1.57683400 |
| H | 2.92466900  | 0.06353500  | -0.59635700 |
| H | 3.10794500  | -1.59111700 | 0.00411500  |
| C | 0.40221200  | -2.18164700 | 0.24248100  |
| H | -0.54929500 | -2.07896300 | 0.76852000  |
| H | 0.21694900  | -2.60796400 | -0.74236800 |
| H | 1.03440400  | -2.87189400 | 0.80398400  |
| C | -1.38777800 | 0.69439400  | 0.03132600  |
| C | -2.60035400 | -0.12464800 | -0.39140600 |
| C | -3.80013100 | 0.21886400  | 0.48499500  |
| S | 0.07603400  | 0.30637600  | -0.97528400 |
| H | -1.10936600 | 0.54310600  | 1.07561800  |
| H | -1.56013800 | 1.76145000  | -0.11400600 |
| H | -2.37919300 | -1.19199900 | -0.32354000 |
| H | -2.82553300 | 0.08422000  | -1.43875800 |
| H | -4.05282600 | 1.27669700  | 0.40490700  |
| H | -4.67120500 | -0.35737400 | 0.17889400  |
| H | -3.60105900 | -0.00422000 | 1.53407600  |
| O | 1.28784100  | -0.23537600 | 1.36859600  |
| H | 0.69822000  | -0.61680100 | 2.02847600  |
| H | 0.84380500  | 1.38855300  | -0.64284400 |
| O | 2.01882000  | 2.30622800  | 0.28042600  |
| H | 2.48159200  | 3.14628000  | 0.21444800  |
| H | 2.19855900  | 1.93869000  | 1.15191400  |

**D-Thiol (Electronic energy: -1228.0879181 Ha):**

|   |             |             |             |
|---|-------------|-------------|-------------|
| C | -0.76219300 | -1.57527200 | 0.12189500  |
| C | 0.16600600  | -2.41122000 | -0.73480700 |
| H | -0.35247700 | -2.82128400 | -1.60025800 |
| H | 1.02117400  | -1.82141900 | -1.06587300 |
| H | 0.53684300  | -3.23250800 | -0.12074000 |
| C | -1.99138300 | -2.31138600 | 0.60708700  |
| H | -2.62408000 | -1.66815000 | 1.22239400  |
| H | -2.58134000 | -2.69516300 | -0.22413000 |
| H | -1.66133200 | -3.15439900 | 1.21681900  |
| C | -2.23982600 | 0.97357100  | 0.00529500  |
| C | -3.75000800 | 0.82331100  | -0.12443800 |
| C | -4.46040700 | 1.80523300  | 0.80104700  |
| S | -1.33985400 | -0.18145800 | -1.07108000 |

|   |             |             |             |
|---|-------------|-------------|-------------|
| H | -1.87970400 | 0.81583700  | 1.02370500  |
| H | -1.91148100 | 1.96673000  | -0.30635100 |
| H | -4.04941200 | -0.19994800 | 0.11214400  |
| H | -4.03926400 | 1.00392800  | -1.16126600 |
| H | -4.20016500 | 1.62431900  | 1.84487100  |
| H | -4.19376600 | 2.83452800  | 0.55863300  |
| H | -5.53988300 | 1.70691500  | 0.70259900  |
| O | -0.03545400 | -0.99293700 | 1.13871600  |
| H | -0.57374700 | -0.87685300 | 1.92955800  |
| H | -0.10462200 | 0.47100300  | -0.99190100 |
| H | 2.06348300  | 2.21715200  | -1.28428000 |
| C | 2.88117300  | 0.28047500  | -0.11632700 |
| H | 2.96961100  | -0.23167300 | -1.07495100 |
| H | 2.50011100  | -0.43140300 | 0.61791300  |
| C | 4.21856900  | 0.85747200  | 0.32324900  |
| H | 4.08673300  | 1.38075500  | 1.27191100  |
| H | 4.54772900  | 1.60232200  | -0.40494600 |
| C | 5.26818400  | -0.24004300 | 0.45921600  |
| H | 6.22289500  | 0.17776800  | 0.77487000  |
| H | 4.96651600  | -0.98181000 | 1.20041700  |
| H | 5.42652800  | -0.75441100 | -0.48992600 |
| S | 1.56939000  | 1.54385900  | -0.23606000 |

**TS3 (Electronic energy: -710.7342954 Ha):**

|   |             |             |             |
|---|-------------|-------------|-------------|
| C | -1.41049700 | 0.30908100  | -0.00571300 |
| C | -2.61202600 | 0.17554900  | -0.91185400 |
| H | -2.34429700 | 0.46953000  | -1.92563800 |
| H | -2.99174700 | -0.84694000 | -0.93499400 |
| H | -3.40323300 | 0.84345700  | -0.56321800 |
| C | -0.83203200 | 1.69429500  | 0.07706100  |
| H | 0.00593900  | 1.74808700  | 0.76850700  |
| H | -0.51299400 | 2.02408900  | -0.91075400 |
| H | -1.61001600 | 2.37426300  | 0.42877800  |
| C | 1.33565000  | -0.61855100 | 0.40327300  |
| C | 2.24060000  | 0.16172500  | -0.53961000 |
| C | 3.57100800  | 0.46826000  | 0.14091700  |
| S | -0.24853200 | -1.09440600 | -0.36850300 |
| H | 1.12570300  | -0.08963200 | 1.33359500  |
| H | 1.78159300  | -1.58088800 | 0.66409200  |
| H | 1.75452800  | 1.08969100  | -0.84595800 |
| H | 2.40404100  | -0.42588300 | -1.44502000 |

|   |             |             |             |
|---|-------------|-------------|-------------|
| H | 3.42686000  | 1.07496600  | 1.03595200  |
| H | 4.08288600  | -0.44980500 | 0.43139900  |
| H | 4.22481900  | 1.01690700  | -0.53450700 |
| O | -1.73876700 | -0.18608800 | 1.35793000  |
| H | -2.68668400 | -0.15455600 | 1.56921100  |
| H | -1.12697000 | -1.23623000 | 0.97671600  |

**TS3(Thiolation, thiol mediation) (Electronic energy: -1228.0773013 Ha):**

|   |             |             |             |
|---|-------------|-------------|-------------|
| C | -1.14826400 | -1.44847300 | 0.55724400  |
| C | -1.15505900 | -2.92829600 | 0.20311200  |
| H | -2.10530600 | -3.21184200 | -0.24711000 |
| H | -0.35661200 | -3.17623500 | -0.49832900 |
| H | -1.01254400 | -3.51907700 | 1.10976300  |
| C | -2.27279200 | -1.09721800 | 1.51396400  |
| H | -2.23128400 | -0.04921900 | 1.80790500  |
| H | -3.23964500 | -1.30096700 | 1.05680700  |
| H | -2.18882600 | -1.71114900 | 2.41533400  |
| C | -1.38208800 | 1.19832700  | -0.47659000 |
| C | -2.80950100 | 1.73053700  | -0.45429200 |
| C | -2.84420600 | 3.18532700  | -0.00057100 |
| S | -1.24919200 | -0.53538500 | -1.02366500 |
| H | -0.90069100 | 1.27327500  | 0.50192400  |
| H | -0.78342900 | 1.78104500  | -1.17975500 |
| H | -3.42479000 | 1.11418800  | 0.20304200  |
| H | -3.23523900 | 1.63348500  | -1.45472100 |
| H | -2.44633100 | 3.29253500  | 1.01028500  |
| H | -2.25259900 | 3.81817400  | -0.66417900 |
| H | -3.86412300 | 3.56669800  | 0.00046900  |
| O | 0.11304000  | -1.09698400 | 1.16857200  |
| H | 0.08951300  | -1.37450100 | 2.09329500  |
| H | 1.09684300  | -1.04923800 | -1.67365000 |
| H | 1.53654600  | -1.46482200 | 0.14486700  |
| C | 2.43665800  | 0.61646000  | -0.55430800 |
| H | 1.42731800  | 0.98629300  | -0.37730600 |
| H | 2.85965200  | 1.08982700  | -1.43992100 |
| C | 3.33135200  | 0.77346400  | 0.66595400  |
| H | 4.30107300  | 0.30658300  | 0.48059900  |
| H | 2.87473600  | 0.25774700  | 1.51423400  |
| C | 3.51506800  | 2.25291600  | 0.99040200  |
| H | 4.14337800  | 2.36995600  | 1.87137400  |
| H | 3.99386500  | 2.77898400  | 0.16422800  |

|   |            |             |             |
|---|------------|-------------|-------------|
| H | 2.55697100 | 2.73274100  | 1.19342400  |
| S | 2.26357900 | -1.15629400 | -0.97950000 |

**TS3(Thiolation, water mediation) (Electronic energy: -787.2104415 Ha):**

|   |             |             |             |
|---|-------------|-------------|-------------|
| C | 1.11495600  | -0.79137900 | 0.09223100  |
| C | 2.39885500  | -1.06028200 | -0.67477000 |
| H | 2.19105100  | -1.56493300 | -1.61749300 |
| H | 2.94006000  | -0.13588600 | -0.87993400 |
| H | 3.04006500  | -1.70589100 | -0.07241800 |
| C | 0.33362300  | -2.05454800 | 0.39273800  |
| H | -0.55520200 | -1.84058700 | 0.98508700  |
| H | 0.04109400  | -2.55756600 | -0.52782400 |
| H | 0.97056200  | -2.73764900 | 0.96065400  |
| C | -1.37151900 | 0.65505100  | 0.05262800  |
| C | -2.55751300 | -0.17573800 | -0.41946800 |
| C | -3.77863600 | 0.09054200  | 0.45369800  |
| S | 0.12971400  | 0.38059800  | -0.94895800 |
| H | -1.10315600 | 0.45705800  | 1.09212500  |
| H | -1.59445800 | 1.71949100  | -0.03702200 |
| H | -2.30274800 | -1.23687100 | -0.39823600 |
| H | -2.77403100 | 0.07220300  | -1.46020400 |
| H | -4.06304900 | 1.14316700  | 0.42068400  |
| H | -4.62935400 | -0.49557900 | 0.11057500  |



|   |             |             |             |
|---|-------------|-------------|-------------|
| H | -3.58548800 | -0.17535800 | 1.49416200  |
| O | 1.39273500  | -0.08246400 | 1.30526400  |
| H | 1.66226900  | -0.71184200 | 1.98527600  |
| H | 1.08820600  | 1.65984100  | -0.36985500 |
| O | 1.87530300  | 2.24114400  | 0.26281700  |
| H | 1.64125100  | 3.13800500  | 0.54111900  |
| H | 1.97460100  | 1.63150400  | 1.02964500  |

**E (Electronic energy: -634.3391819 Ha):**

|   |             |             |             |
|---|-------------|-------------|-------------|
| C | 1.50901900  | 0.23040600  | -0.02277900 |
| C | 2.91985400  | -0.00299100 | 0.38139400  |
| H | 3.17581200  | 0.68568600  | 1.19106200  |
| H | 3.11905500  | -1.02687400 | 0.68720500  |
| H | 3.56426500  | 0.25602700  | -0.46465700 |
| C | 1.10323100  | 1.61917800  | -0.33207900 |
| H | 0.14887500  | 1.70973600  | -0.84008600 |
| H | 1.04677500  | 2.16209900  | 0.61920100  |
| H | 1.89011800  | 2.10245100  | -0.91441700 |
| C | -1.11978400 | -0.55836300 | -0.56713900 |
| C | -1.89134200 | 0.10121700  | 0.57287400  |
| C | -3.30746300 | 0.44198400  | 0.12000300  |
| S | 0.54368600  | -1.09200900 | -0.07651100 |
| H | -1.03424700 | 0.07250800  | -1.45194100 |
| H | -1.59284200 | -1.49362400 | -0.87272900 |
| H | -1.37105300 | 1.00395500  | 0.89991700  |
| H | -1.92039900 | -0.57658700 | 1.42814700  |
| H | -3.84803100 | -0.45493500 | -0.18325700 |
| H | -3.86050300 | 0.90752000  | 0.93373100  |
| H | -3.29788400 | 1.13560200  | -0.72162900 |

**TS4 (Electronic energy: -903.6728398 Ha):**

|   |            |             |            |
|---|------------|-------------|------------|
| C | 2.11640600 | -1.10707300 | 0.02962400 |
|---|------------|-------------|------------|

|   |             |             |             |
|---|-------------|-------------|-------------|
| C | 2.71251600  | -1.95490100 | -1.02429000 |
| O | 2.37542300  | 0.20006200  | -0.00674700 |
| C | 1.37367100  | -1.41078900 | 1.15938000  |
| C | 1.69007400  | 0.78984700  | 1.01504700  |
| C | 1.14188500  | -0.20454100 | 1.81351400  |
| H | 2.30136300  | -2.96009800 | -0.97718800 |
| H | 2.52908600  | -1.52966100 | -2.01032300 |
| H | 3.79342900  | -2.01204400 | -0.87886300 |
| H | 1.05330000  | -2.39799800 | 1.44919000  |
| H | 0.60653400  | -0.04363800 | 2.73615700  |
| H | 1.99426900  | 1.79301100  | 1.26329700  |
| C | -0.04979600 | 1.42160200  | -0.18263800 |
| C | 0.69503100  | 2.45201300  | -0.99629600 |
| H | 1.17392400  | 3.18720300  | -0.35137800 |
| H | 1.43898700  | 2.00336100  | -1.65145900 |
| H | -0.03549600 | 2.98067600  | -1.61439000 |
| C | -0.94235400 | 1.97163400  | 0.89047300  |
| H | -1.42488900 | 1.20877300  | 1.49470900  |
| H | -0.37686900 | 2.63878000  | 1.54121700  |
| H | -1.71800300 | 2.57314600  | 0.40680500  |
| C | -1.68739500 | -0.86344500 | -0.13833700 |
| C | -3.10445200 | -0.36783800 | -0.40240600 |
| C | -4.11704500 | -1.19861000 | 0.37850000  |
| S | -0.41779700 | 0.03063000  | -1.07458700 |
| H | -1.57216700 | -1.89856900 | -0.46613800 |
| H | -1.42117000 | -0.82787600 | 0.91904000  |
| H | -3.30985500 | -0.42829200 | -1.47264300 |
| H | -3.18814700 | 0.68478800  | -0.12599300 |
| H | -4.06274700 | -2.25055800 | 0.09549100  |
| H | -3.94161900 | -1.12752900 | 1.45316900  |
| H | -5.12981700 | -0.85144300 | 0.18125300  |

**F (Electronic energy: -903.6876057 Ha):**

|   |            |             |             |
|---|------------|-------------|-------------|
| C | 2.35924700 | -0.97088900 | 0.02435800  |
| C | 3.21379000 | -1.66712200 | -0.94478900 |
| O | 2.27351900 | 0.30882400  | -0.01743700 |
| C | 1.57686800 | -1.51949500 | 1.08978100  |
| C | 1.26231500 | 0.74701900  | 0.90660800  |
| C | 0.94839200 | -0.47761400 | 1.66313900  |
| H | 2.55866800 | -2.18500000 | -1.65291600 |

|   |             |             |             |
|---|-------------|-------------|-------------|
| H | 3.84452900  | -0.96661100 | -1.48475600 |
| H | 3.81116500  | -2.42592900 | -0.43846200 |
| H | 1.53799800  | -2.56515300 | 1.34945200  |
| H | 0.28395800  | -0.49962700 | 2.51509200  |
| H | 1.69459700  | 1.54806600  | 1.51139600  |
| C | 0.07391300  | 1.35651500  | 0.06216300  |
| C | 0.63978900  | 2.53724200  | -0.73175000 |
| H | 1.09868200  | 3.26162400  | -0.05560600 |
| H | 1.38444300  | 2.21792200  | -1.45973400 |
| H | -0.17088300 | 3.02968600  | -1.26574200 |
| C | -0.98996300 | 1.84254500  | 1.03892300  |
| H | -1.46645100 | 1.03510200  | 1.59413100  |
| H | -0.54706700 | 2.53904700  | 1.75552900  |
| H | -1.76258400 | 2.37794300  | 0.48898900  |
| C | -1.72230800 | -0.88730500 | -0.30147200 |
| C | -3.16260600 | -0.40199700 | -0.41006300 |
| C | -4.11871600 | -1.36248000 | 0.28790200  |
| S | -0.50776700 | 0.15003400  | -1.17212400 |
| H | -1.62395400 | -1.87062500 | -0.76619900 |
| H | -1.42114600 | -1.00738000 | 0.74210500  |
| H | -3.42008500 | -0.30983600 | -1.46663600 |
| H | -3.25313500 | 0.59747200  | 0.01800400  |
| H | -4.05852000 | -2.36139400 | -0.14687300 |
| H | -3.89021800 | -1.44472900 | 1.35236900  |
| H | -5.14819900 | -1.02023000 | 0.19453200  |

**TS5 (Electronic energy: -903.6436549 Ha):**

|   |             |             |             |
|---|-------------|-------------|-------------|
| C | -2.46142900 | 1.23396400  | 0.02054700  |
| C | -2.74467500 | 2.66441400  | 0.25119300  |
| O | -1.23208200 | 0.79755200  | 0.30213700  |
| C | -3.23336100 | 0.21012300  | -0.47960300 |
| C | -1.15072100 | -0.53591200 | -0.05765200 |
| C | -2.42493800 | -0.92661400 | -0.48806100 |
| H | -3.79286300 | 2.87459600  | 0.05639600  |
| H | -2.50586200 | 2.93342300  | 1.28078500  |
| H | -2.13011700 | 3.28082300  | -0.40774200 |
| H | -4.25745100 | 0.29187800  | -0.80184000 |
| H | -2.69534500 | -1.91942000 | -0.81291400 |

|   |             |             |             |
|---|-------------|-------------|-------------|
| H | -0.43391500 | -0.56739400 | -1.23030100 |
| C | 0.04678200  | -1.32416800 | 0.45225300  |
| C | -0.25030400 | -2.81654500 | 0.41697200  |
| H | -1.03520500 | -3.04663800 | 1.13926200  |
| H | -0.57692500 | -3.14860600 | -0.57025800 |
| H | 0.64642700  | -3.37577000 | 0.68028100  |
| C | 0.57088800  | -0.86161300 | 1.79660400  |
| H | 0.80248600  | 0.20191600  | 1.80873500  |
| H | -0.19116900 | -1.04969100 | 2.55562300  |
| H | 1.46466800  | -1.42629300 | 2.06057300  |
| C | 1.89491300  | 0.63199700  | -0.72859300 |
| C | 3.21313000  | 0.61262900  | 0.03689200  |
| C | 3.75187300  | 2.02906200  | 0.20748000  |
| S | 1.21426800  | -1.03244600 | -1.00195000 |
| H | 2.04230500  | 1.02821100  | -1.73510000 |
| H | 1.13840100  | 1.24615600  | -0.23796300 |
| H | 3.93124100  | -0.00296700 | -0.50761800 |
| H | 3.07288600  | 0.14438500  | 1.01255900  |
| H | 3.91745200  | 2.50449000  | -0.76019000 |
| H | 3.05717100  | 2.64986900  | 0.77552800  |
| H | 4.70124700  | 2.01572600  | 0.74010500  |

**TS5(Thiolation, Thiol mediation) (Electronic energy: -1420.978422 Ha):**

|   |             |             |             |
|---|-------------|-------------|-------------|
| C | 1.96468400  | 0.48430800  | 1.52047300  |
| C | 2.37073900  | -0.57406000 | 2.47135700  |
| O | 0.71619600  | 0.45133900  | 1.05720000  |
| C | 2.64005000  | 1.56883300  | 1.00873000  |
| C | 0.54173100  | 1.50821200  | 0.17133000  |
| C | 1.72613400  | 2.25133900  | 0.20264500  |
| H | 2.01681700  | -1.55041200 | 2.14104200  |
| H | 3.45276400  | -0.59302800 | 2.57654900  |
| H | 1.92979200  | -0.37320900 | 3.45023300  |
| H | 3.66743300  | 1.82415500  | 1.20594300  |
| H | 1.90806200  | 3.14400200  | -0.37612500 |
| H | 0.96827600  | 0.86109200  | -1.01502500 |
| C | -0.88301700 | 1.96390600  | -0.07064000 |
| C | -0.86450000 | 3.06937800  | -1.12787000 |
| H | -0.30346500 | 3.93294400  | -0.76782700 |
| H | -0.42121900 | 2.73167400  | -2.06769200 |
| H | -1.88422700 | 3.39020500  | -1.33358200 |
| C | -1.47598200 | 2.48801900  | 1.23811200  |

|   |             |             |             |
|---|-------------|-------------|-------------|
| H | -1.45687700 | 1.73034600  | 2.02033500  |
| H | -0.90123900 | 3.35013800  | 1.58307200  |
| H | -2.50843700 | 2.79753600  | 1.07591200  |
| H | 0.10352600  | 0.04686900  | -2.80980300 |
| S | -1.92452100 | 0.62896500  | -0.78947800 |
| C | -2.33145100 | -0.46022600 | 0.61049900  |
| H | -2.97901700 | 0.08003800  | 1.30119800  |
| H | -1.42241400 | -0.75126400 | 1.13835900  |
| C | -3.05441500 | -1.68956400 | 0.07011500  |
| H | -3.93303800 | -1.37243800 | -0.49601700 |
| H | -2.40339600 | -2.21681300 | -0.63298200 |
| C | -3.47052300 | -2.62514900 | 1.19954100  |
| H | -4.14621200 | -2.12344600 | 1.89325800  |
| H | -3.98483300 | -3.50155900 | 0.80781800  |
| H | -2.60288600 | -2.96965200 | 1.76532200  |
| C | 0.79269000  | -1.75220700 | -1.37336700 |
| H | 0.34451300  | -2.41068500 | -2.11681600 |
| H | 0.03366000  | -1.47212000 | -0.64305400 |
| C | 2.00651300  | -2.39619100 | -0.72142900 |
| H | 2.53045000  | -1.65561100 | -0.10999400 |
| H | 2.71104800  | -2.71624700 | -1.49103600 |
| C | 1.58163800  | -3.58536600 | 0.13319200  |
| H | 1.10876900  | -4.35516700 | -0.47755300 |
| H | 2.44164500  | -4.03534300 | 0.62744600  |
| H | 0.86422300  | -3.28455200 | 0.90021500  |
| S | 1.29145700  | -0.23056200 | -2.24820600 |

**TS5(Thiolation, water mediation) (Electronic energy: -980.1019165 Ha):**

|   |            |             |             |
|---|------------|-------------|-------------|
| C | 2.19099300 | 1.61708700  | -0.11359500 |
| C | 2.16795700 | 3.09313500  | -0.18531100 |
| O | 1.02928100 | 0.98020900  | -0.16978100 |
| C | 3.23003300 | 0.72408500  | 0.04228900  |
| C | 1.25678800 | -0.38621500 | -0.01257000 |
| C | 2.64945900 | -0.54267900 | 0.06019100  |
| H | 3.18085100 | 3.48645500  | -0.17955500 |
| H | 1.66038200 | 3.41307400  | -1.09604300 |
| H | 1.61974000 | 3.50418200  | 0.66397900  |
| H | 4.27221900 | 0.97639100  | 0.14017400  |
| H | 3.15389700 | -1.48992700 | 0.18040100  |
| H | 1.12538300 | -0.58831200 | 1.33108900  |

|   |             |             |             |
|---|-------------|-------------|-------------|
| C | 0.21139900  | -1.31456200 | -0.61143600 |
| C | 0.65385600  | -2.76071000 | -0.37604400 |
| H | 1.58197300  | -2.96304300 | -0.91233500 |
| H | 0.80557600  | -2.97676300 | 0.68377000  |
| H | -0.10912700 | -3.43883100 | -0.75450400 |
| C | 0.06768000  | -1.03141600 | -2.10652300 |
| H | -0.21141700 | 0.00353600  | -2.29734100 |
| H | 1.01844900  | -1.22693900 | -2.60693300 |
| H | -0.69205100 | -1.68515700 | -2.53475900 |
| O | 0.61323700  | -0.87929600 | 2.47794800  |
| H | 0.71618400  | -0.24114800 | 3.19597700  |
| H | -0.33598000 | -0.94586700 | 2.21845700  |
| S | -1.41979300 | -1.17716700 | 0.24618300  |
| C | -2.14210900 | 0.39242200  | -0.32593300 |
| H | -2.31059200 | 0.31566200  | -1.40003000 |
| H | -1.45634300 | 1.21570900  | -0.13154900 |
| C | -3.46899000 | 0.60677900  | 0.39551700  |
| H | -4.11627700 | -0.25641000 | 0.22619300  |
| H | -3.29562100 | 0.66531100  | 1.47275600  |
| C | -4.15569100 | 1.87764100  | -0.09233200 |
| H | -4.36691500 | 1.82208200  | -1.16092300 |
| H | -5.10052300 | 2.02886800  | 0.42743800  |
| H | -3.53152800 | 2.75509100  | 0.08396200  |

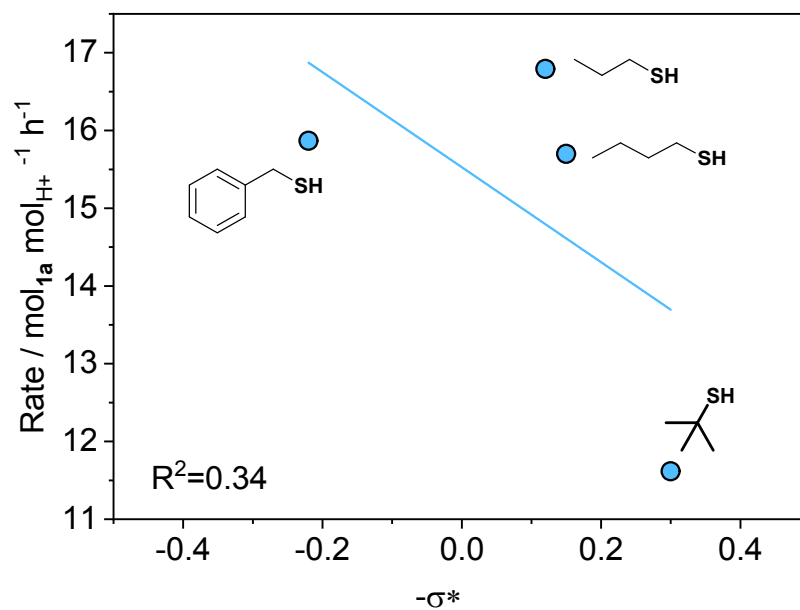

**Figure S4.** Formation rate of **1a** vs. electronic parameters. Reaction conditions: 4 mmol 2-PF, 2 mmol 2-undecanone, 0.05 g Aquivion PW79S (0.063 mmol H<sup>+</sup>), SH/H<sup>+</sup>=1 (molar ratio), 65 °C. The rates are calculated at low conversion of 2-pentylfuran <32%.

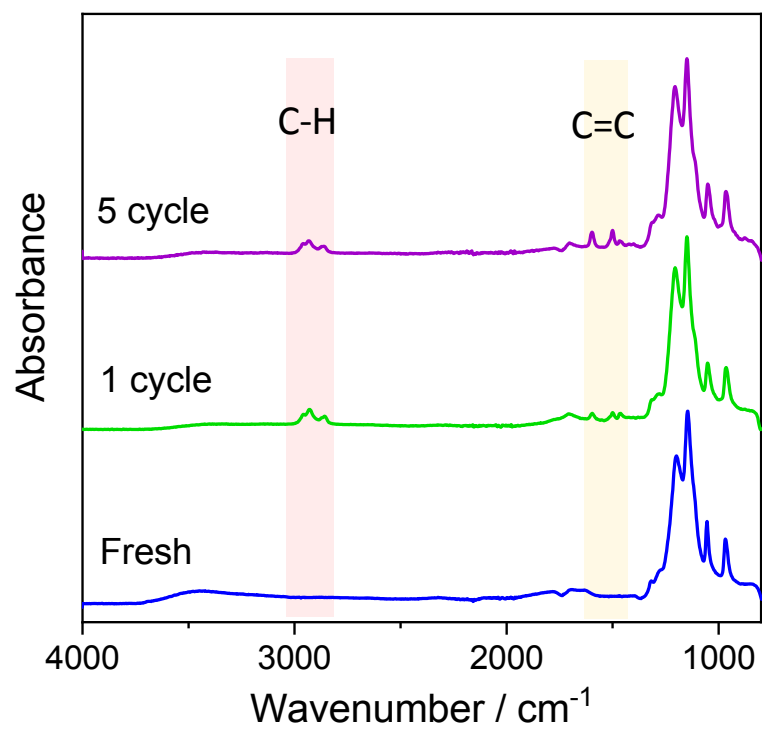

**Figure S5.** ATR-IR spectra of fresh and used Aquivion PW79S catalysts.



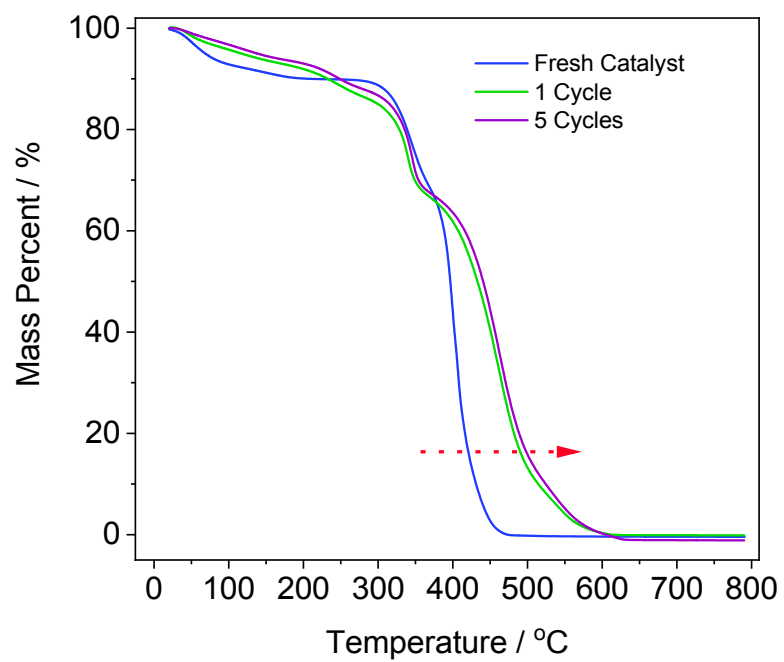

**Figure S6.** TGA of fresh and used Aquivion PW79S catalysts.

**Identification of the synthesized compounds**  
**C<sub>29</sub>-FL1: HAA of 2-propylfuran + 2-undecanone**  
<sup>1</sup>H and <sup>13</sup>C-NMR Spectroscopy

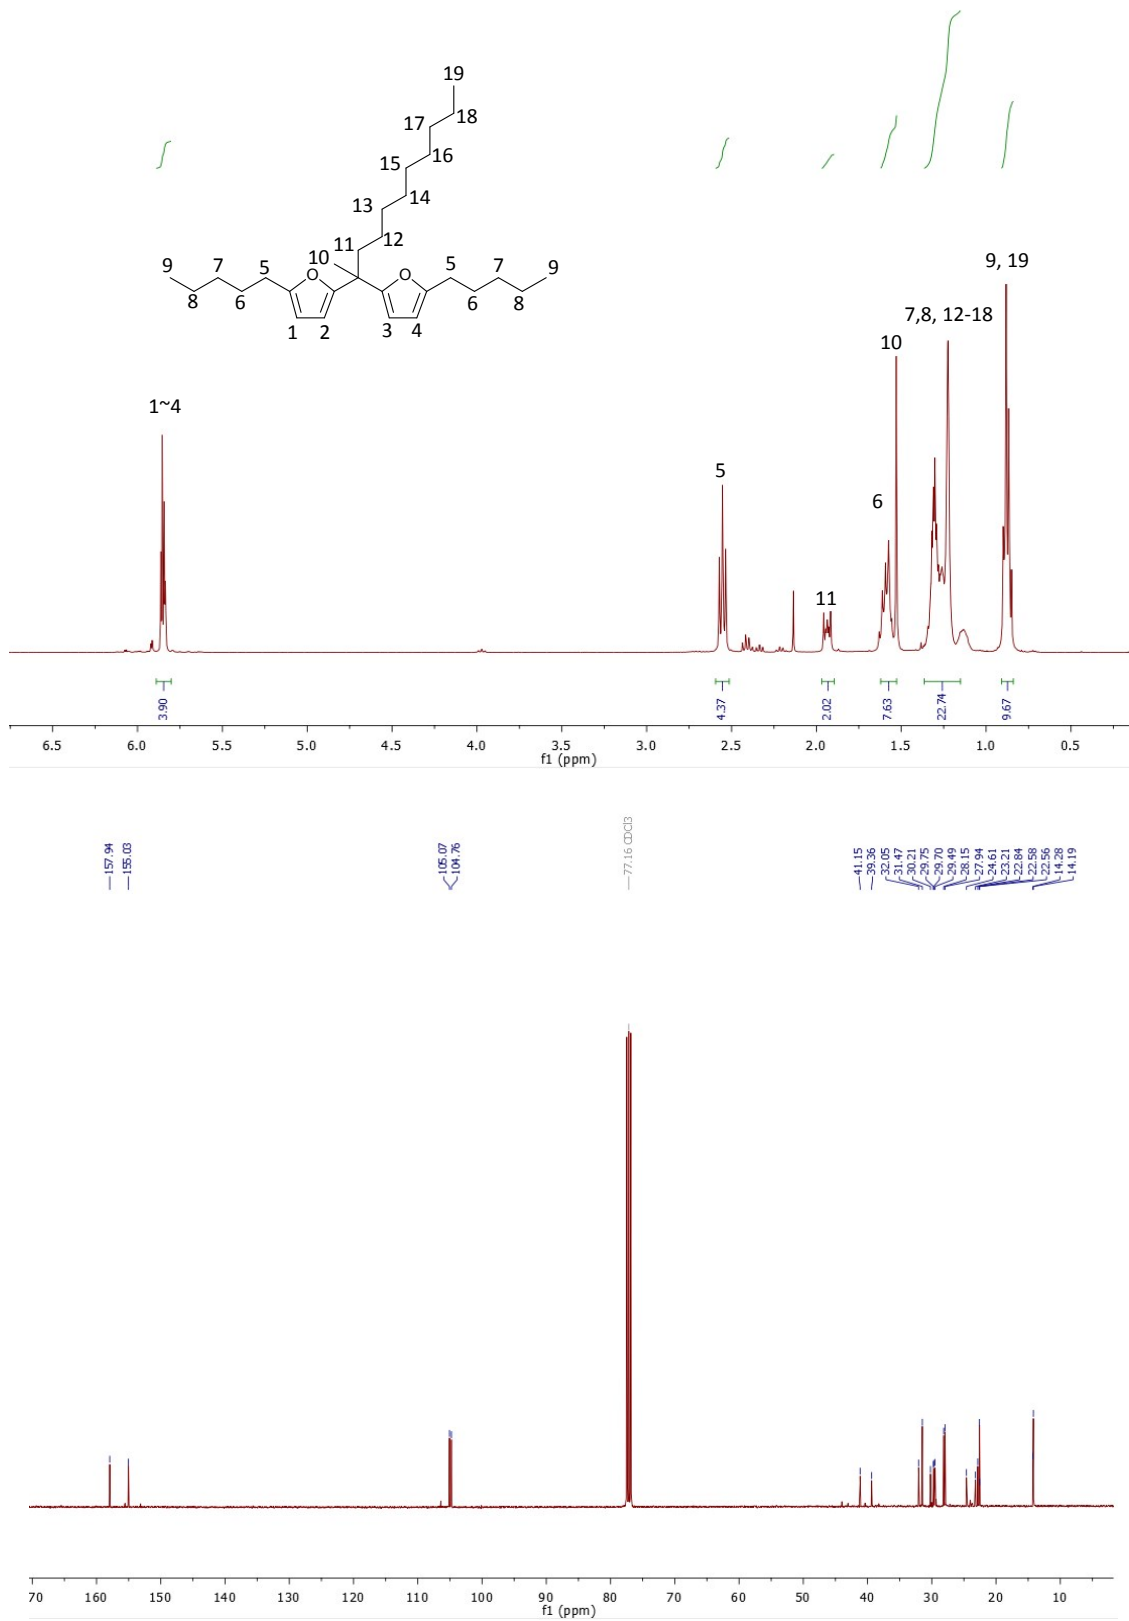

GC-MS (MS spectrum)

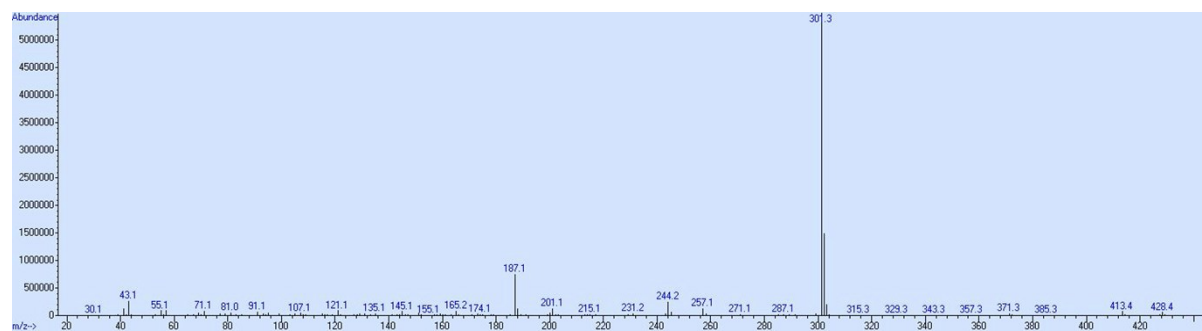

HR-MS-LIFDI: C<sub>29</sub>H<sub>48</sub>O<sub>2</sub> Calc. Mass 428.3654, found Mass 428.3669

## C<sub>29</sub>-FL2: HAA of 2-propylfuran + 4-undecanone

<sup>1</sup>H and <sup>13</sup>C-NMR Spectroscopy

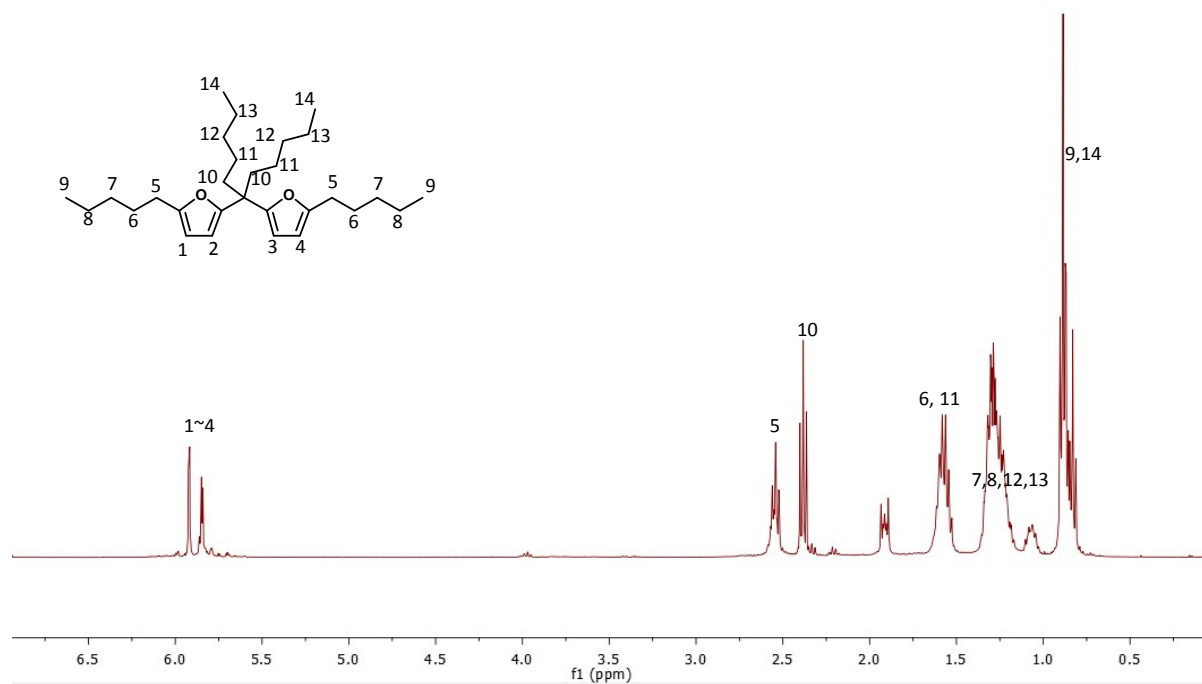

## GC-MS (MS spectrum)

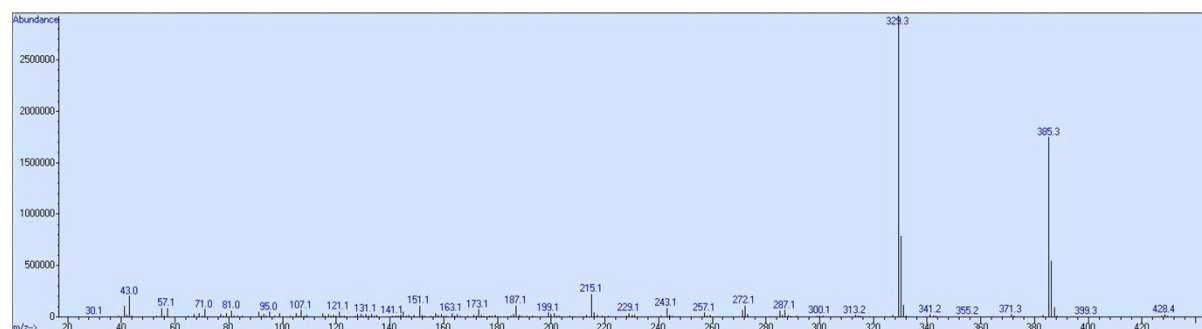

HR-MS-LIFDI: C<sub>29</sub>H<sub>48</sub>O<sub>2</sub> Calc. Mass 428.3654, found Mass 428.3652

## C<sub>29</sub>-FL3: HAA of 2-propylfuran + 6-undecanone

<sup>1</sup>H and <sup>13</sup>C-NMR Spectroscopy

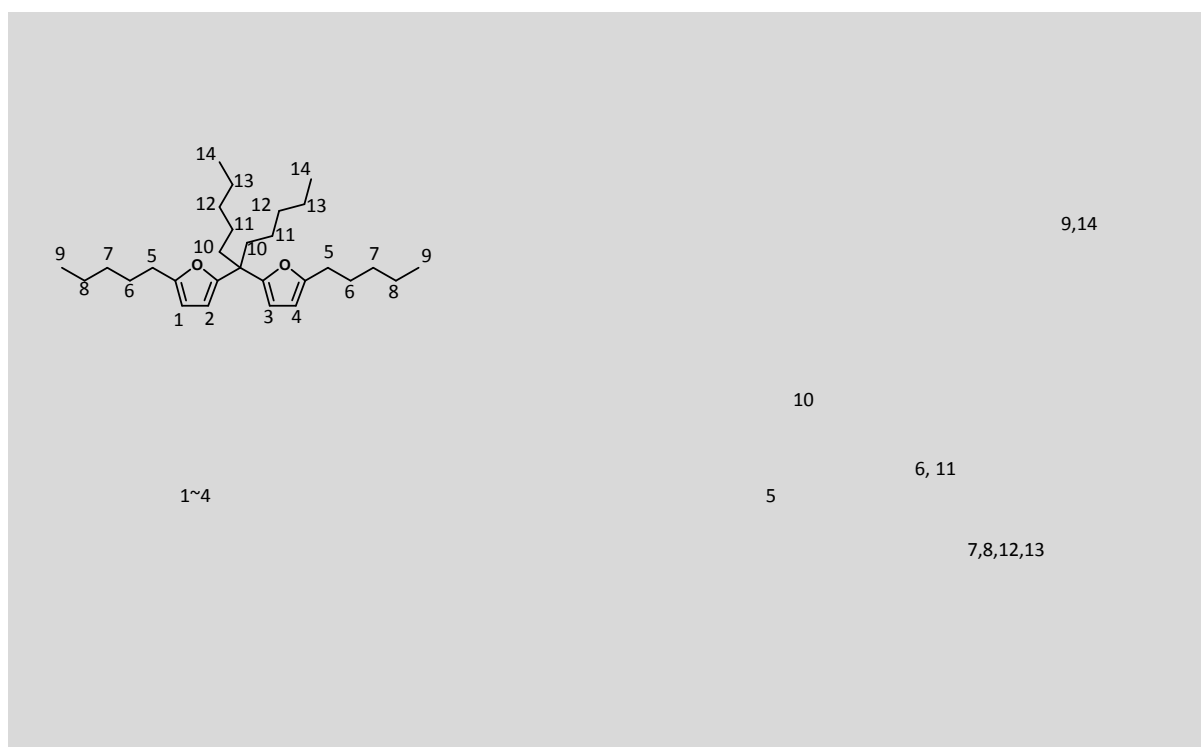

GC-MS (MS spectrum)

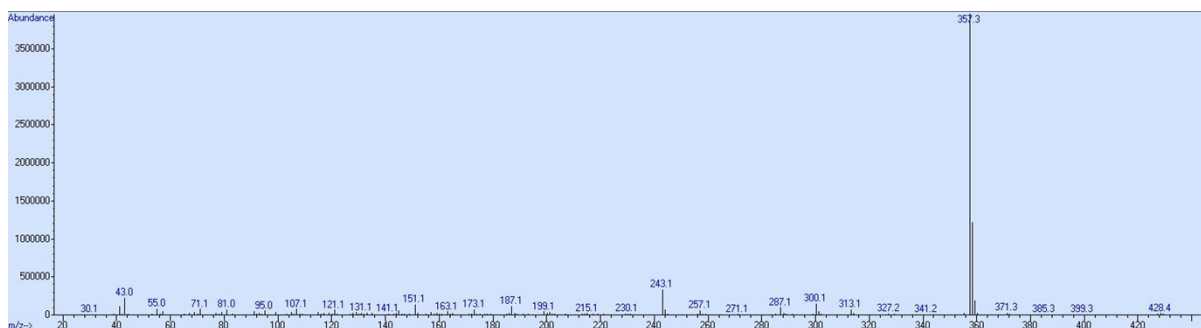

HR-MS-LIFDI: C<sub>29</sub>H<sub>48</sub>O<sub>2</sub> Calc. Mass 428.3654, found Mass 428.3656

# C<sub>27</sub>-FL1: CA-HAA of 2-pentylfuran + 2-nonanone

<sup>1</sup>H and <sup>13</sup>C-NMR Spectroscopy

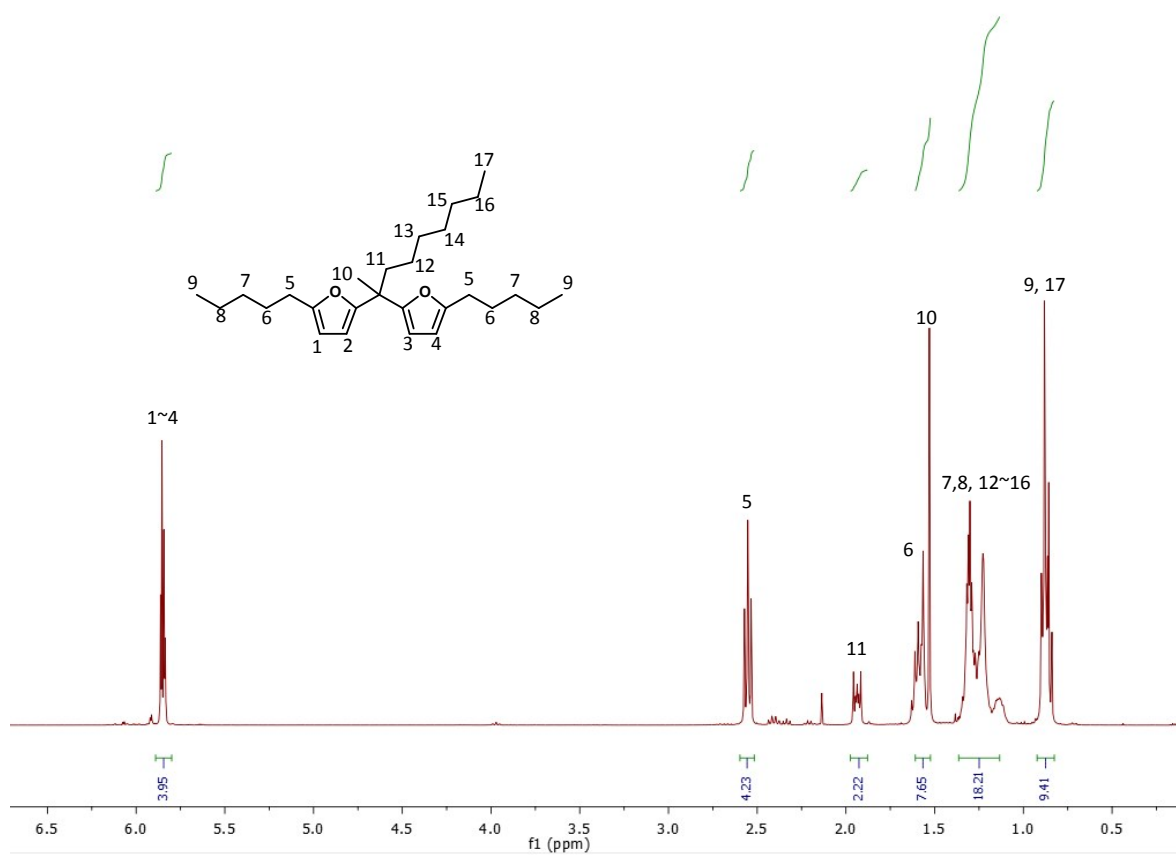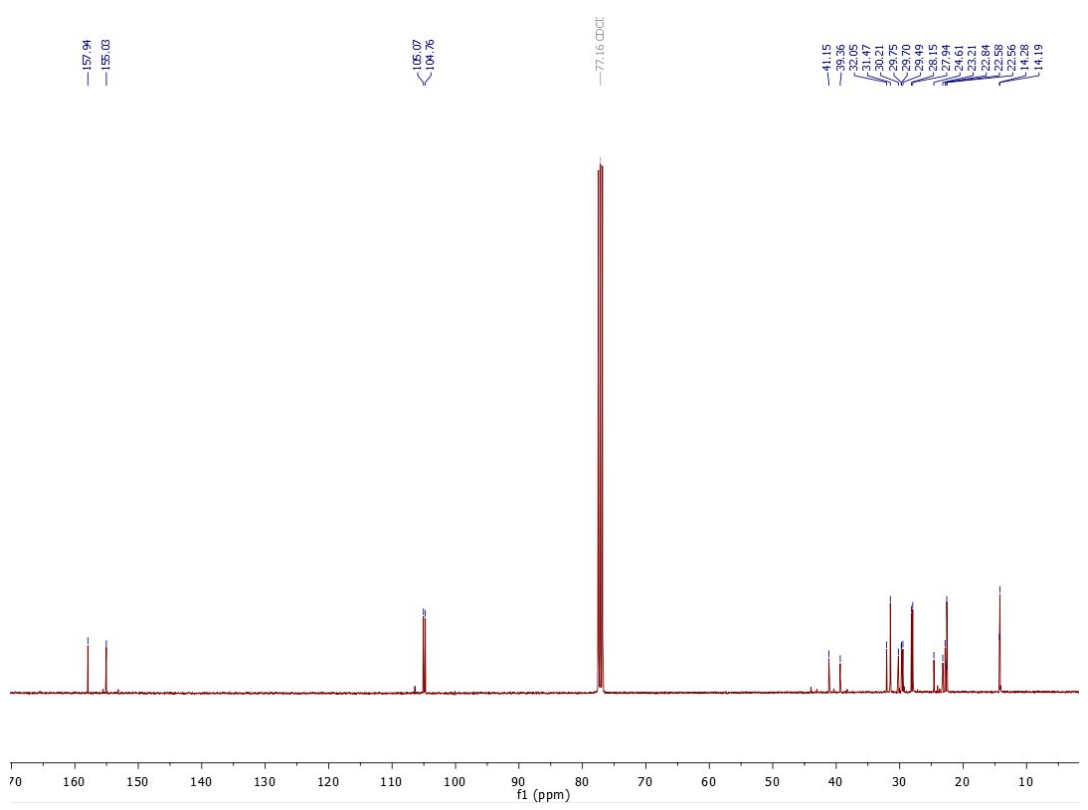

GC-MS (MS spectrum)

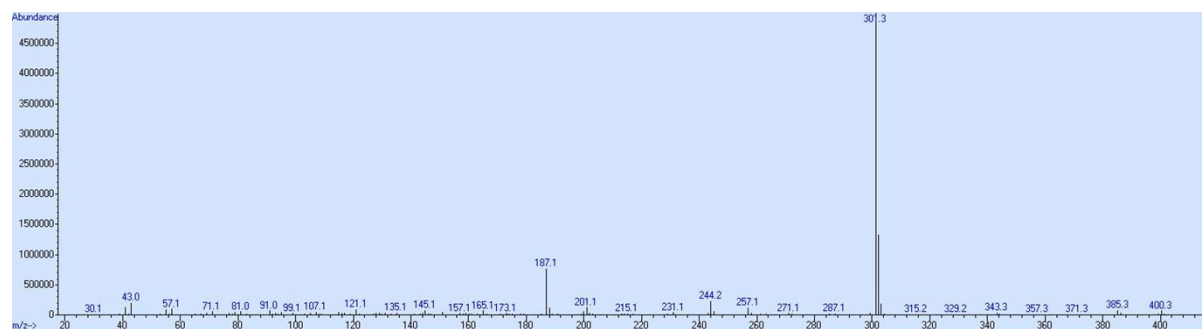

HR-MS-LIFDI:  $C_{27}H_{44}O_2$  Calc. Mass 400.3341, found Mass 400.3346

# C<sub>24</sub>-FL: HAA of 2-pentylfuran + 2-hexanone

<sup>1</sup>H and <sup>13</sup>C-NMR Spectroscopy

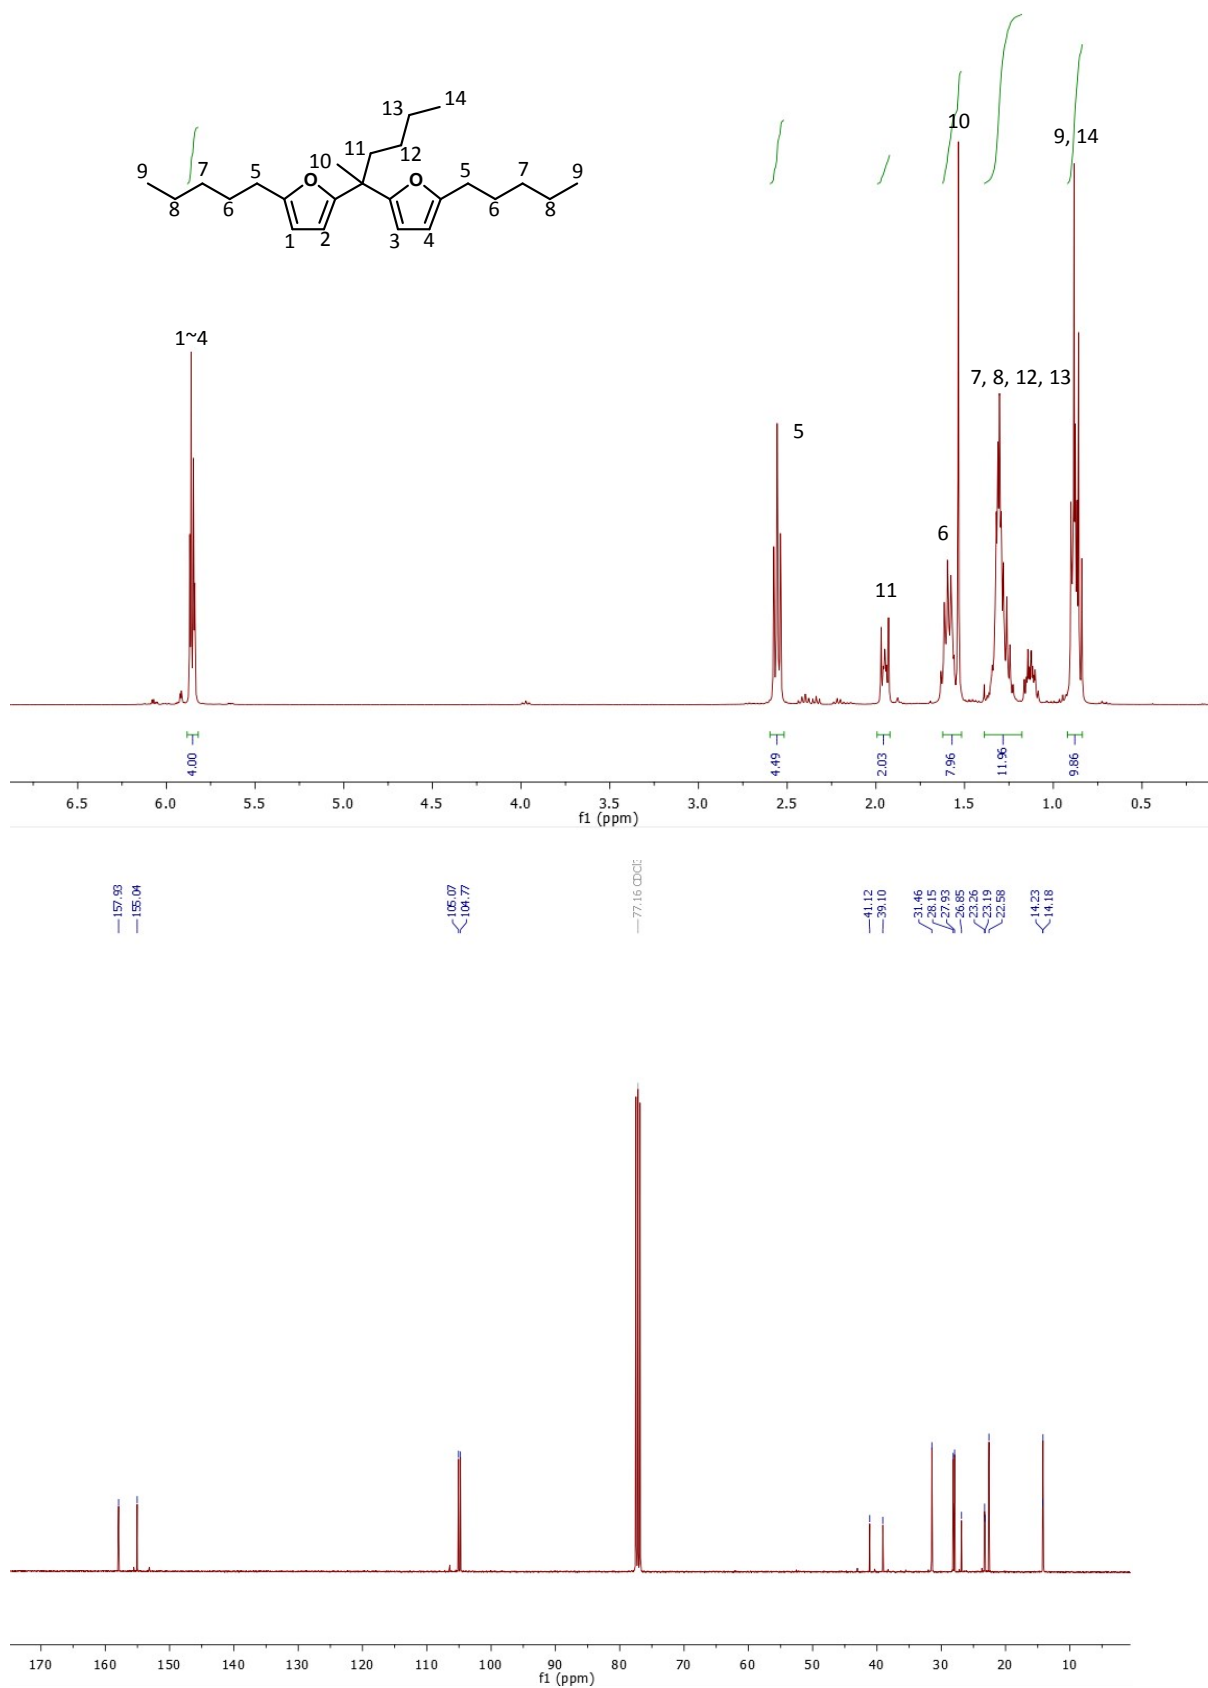



GC-MS (MS spectrum)

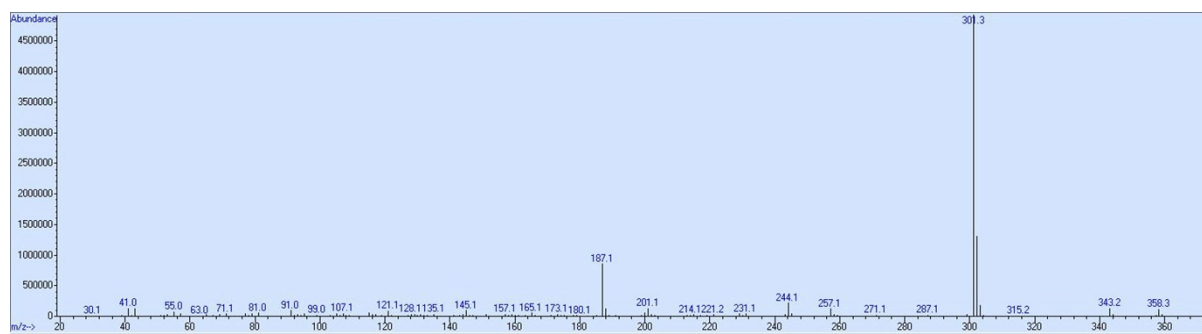

HR-MS-LIFDI:  $C_{24}H_{38}O_2$  Calc. Mass 358.2872, found Mass 358.2889

# C<sub>27</sub>-FL2: HAA of 2-pentylfuran + 4-propylcyclohexanone

<sup>1</sup>H and <sup>13</sup>C-NMR Spectroscopy

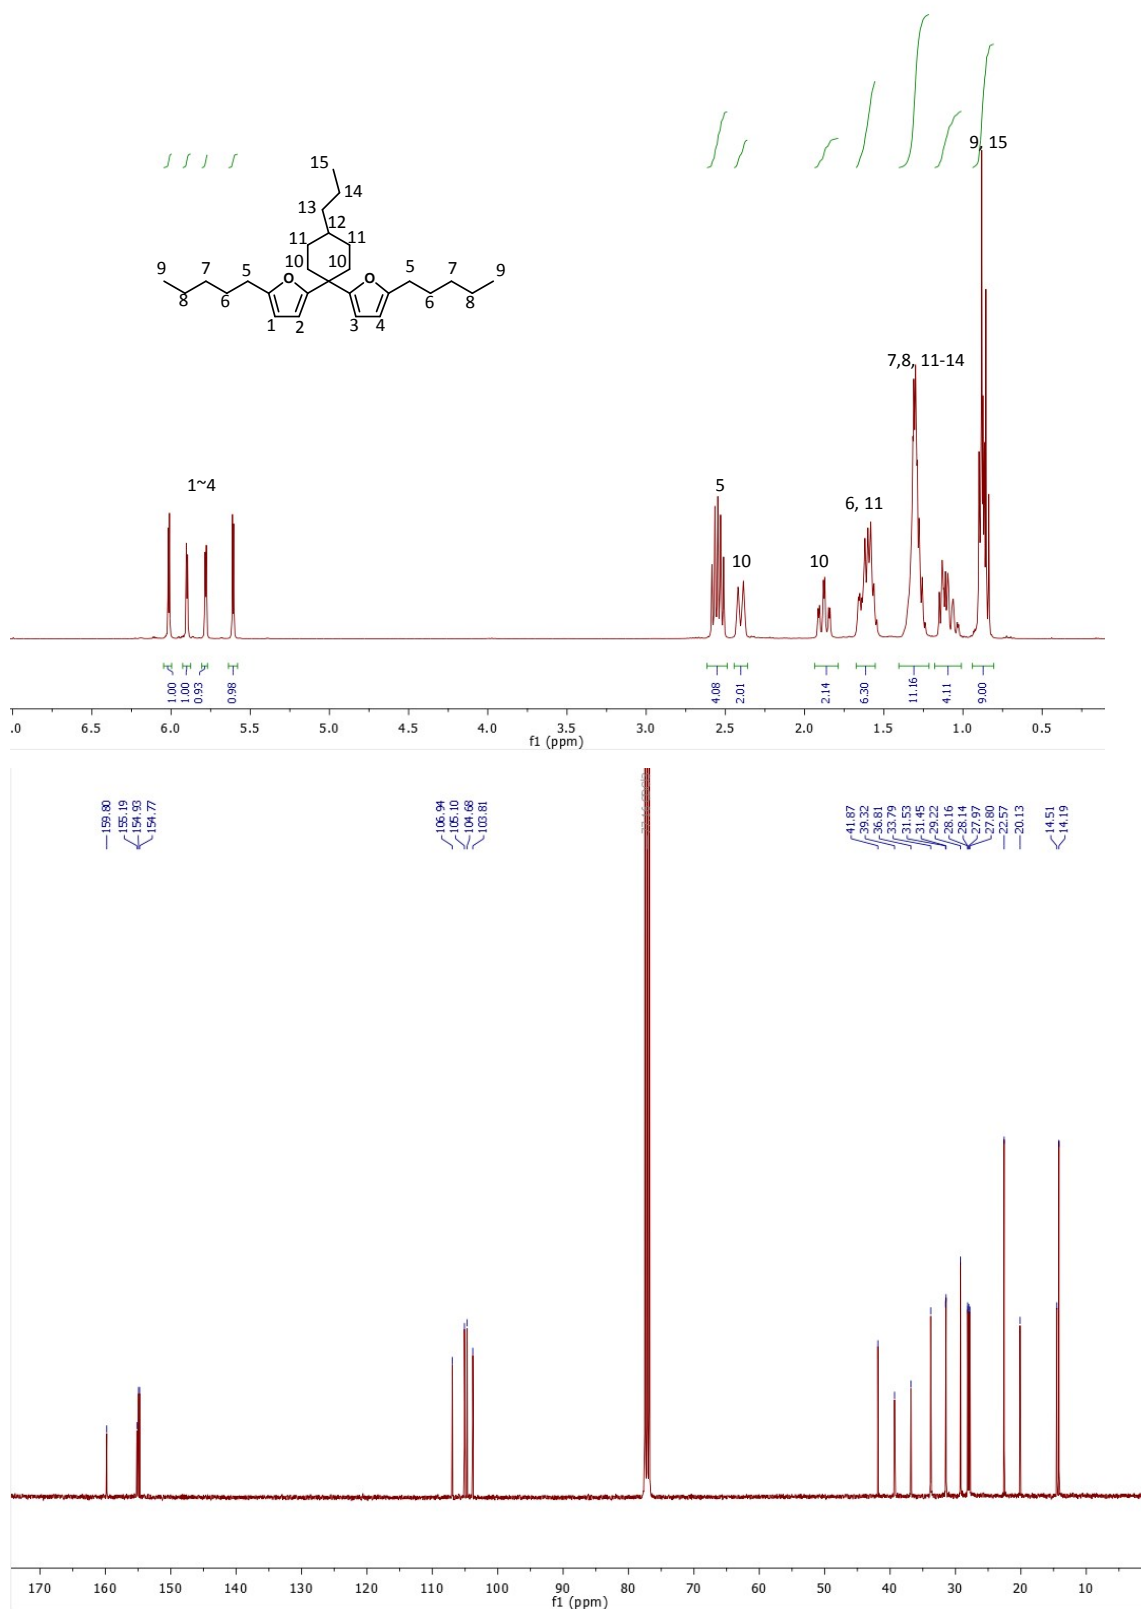

GC-MS (MS spectrum)

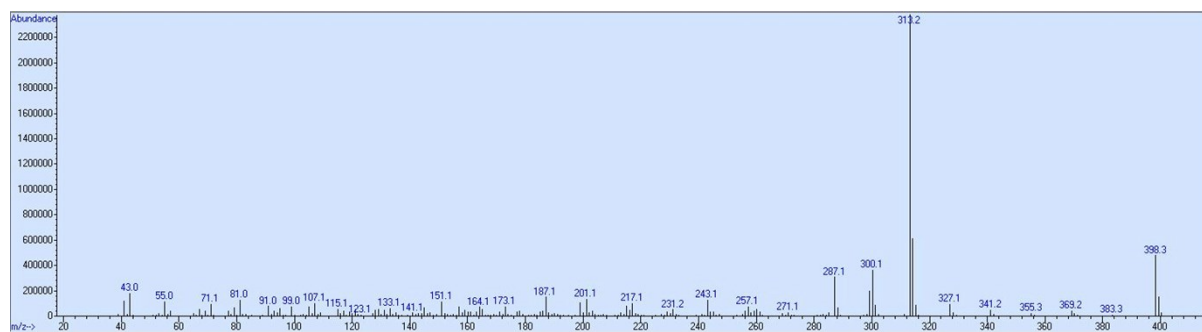

HR-MS-LIFDI:  $C_{27}H_{42}O_2$  Calc. Mass 398.3185, found Mass 398.3191
